# Supplementary material for: Novel personalized cancer vaccine platform based on Bacillus Calmette-Guèrin
Source: PubMed Central journal article supplement (PMC8286790; doi:10.1136/jitc-2021-002707), 2021-07-15

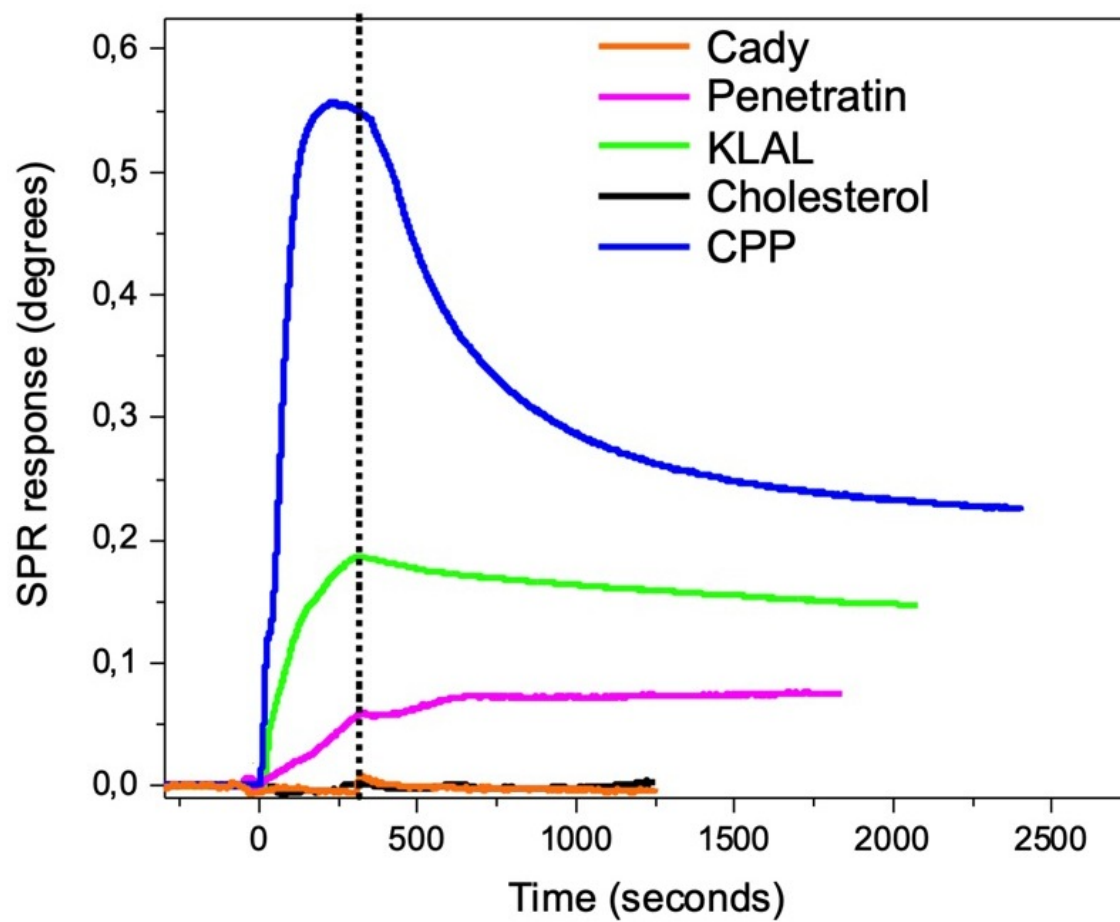

Supplement: jitc-2021-002707supp003.pdf [file jitc-2021-002707supp003.pdf]
